# Supplementary material
Source: publisher figshare collection journal article supplement (https://gsajournals.figshare.com/ndownloader/files/15276746)
Supplement: Supplementary file 1 [file 15276746]

**Supplementary Information**

***Cis* and *trans* chromosomal interactions define pericentric boundaries in the absence of conventional heterochromatin**

Lakshmi Sreekumar*, Priya Jaitly*, Yao Chenǂ, Bhagya C. Thimmappa*,1, Amartya Sanyalǂ, Kaustuv Sanyal*,2

*Molecular Biology and Genetics Unit, Jawaharlal Nehru Centre for Advanced Scientific Research, Bangalore, India; ǂ School of Biological Sciences, Nanyang Technological University, 60 Nanyang Drive, Singapore 637551

1Present address: Bhagya C. Thimmappa, Department of Biochemistry, Robert-Cedergren Centre for Bioinformatics and Genomics, University of Montreal, 2900 Edouard-Montpetit, Montreal, H3T1J4, QC, Canada

2corresponding author

Kaustuv Sanyal
Molecular Biology & Genetics Unit
Jawaharlal Nehru Centre for Advanced Scientific Research   
Jakkur, Bangalore - 560064
India
Email: [sanyal@jncasr.ac.in](mailto:sanyal@jncasr.ac.in)
Telephone: +91-80-2208 2878
Fax: +91-80-2208 2766
Homepage: <http://www.jncasr.ac.in/sanyal>


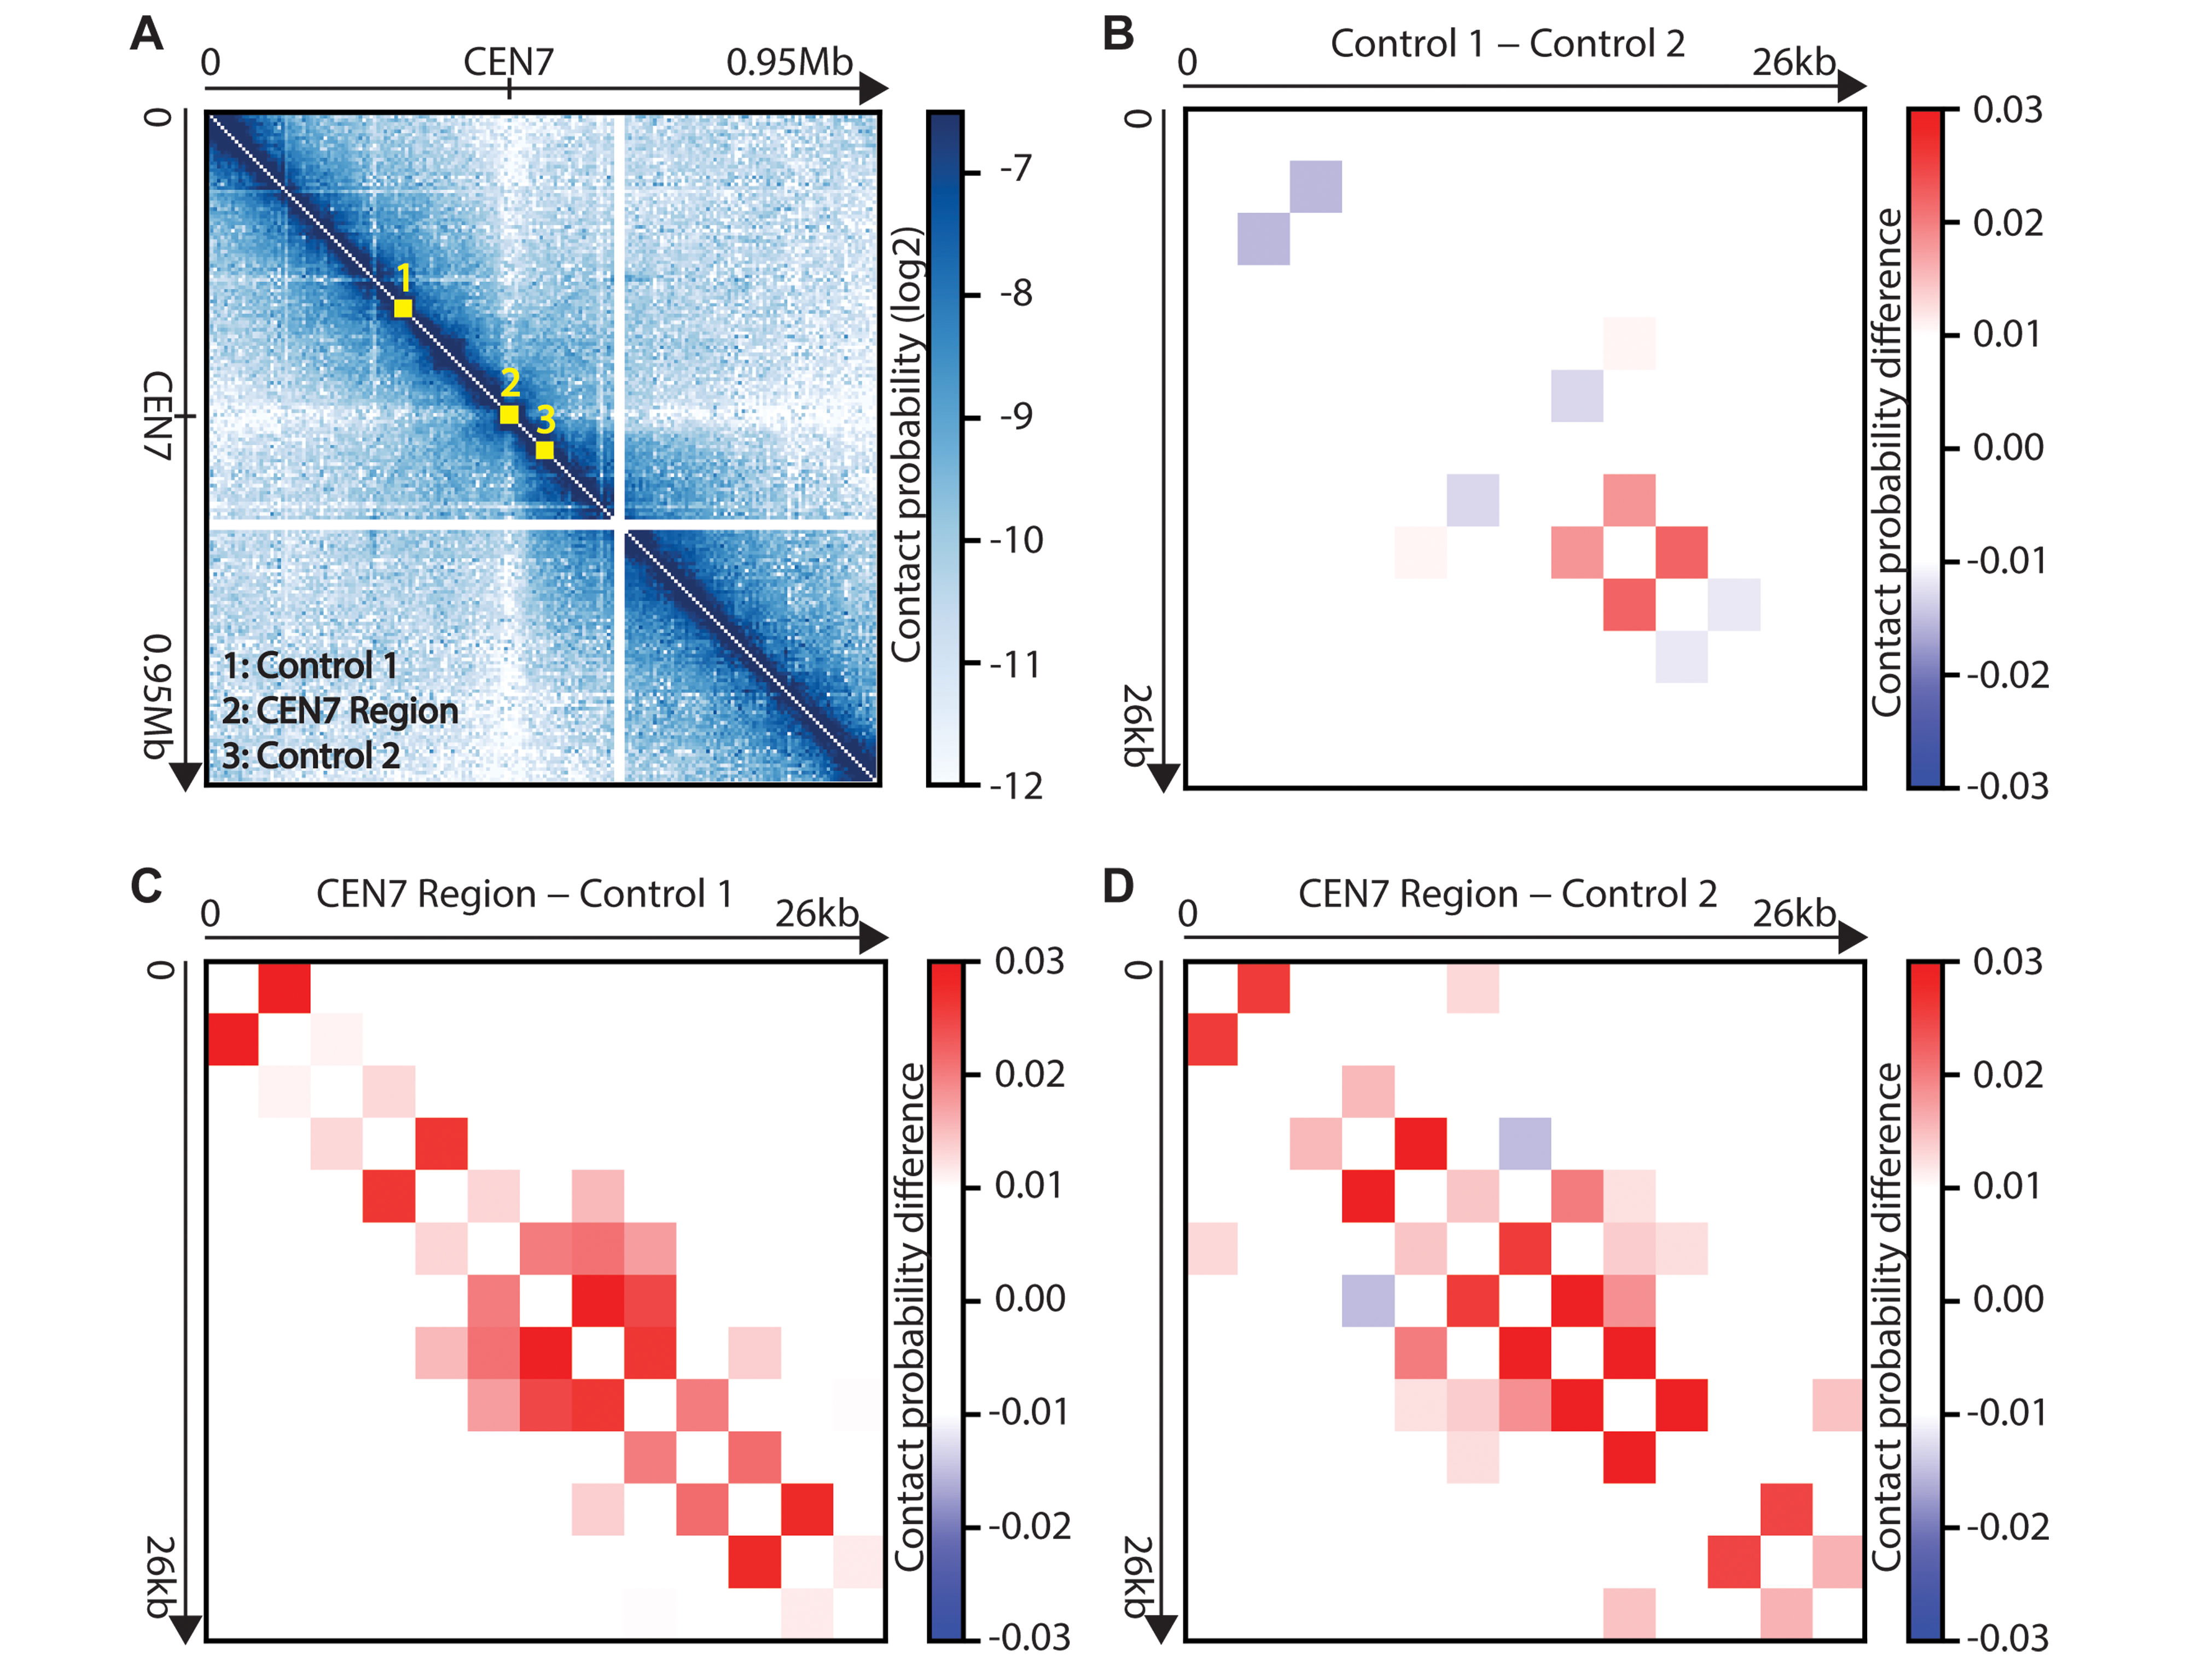


**Figure S1. The intrachromosomal Hi-C interactions of *C. albicans*** (**A**) The chromosome-wide contact probability heatmap (bin size= 5 kb) of Chr7. Yellow boxes represent three 26 kb regions, including the *CEN7* region (pericentric) and two randomly-selected control regions - one 150 kb upstream (control 1) and the other 50 kb downstream (control 2) of *CEN7* respectively. Color bar denotes log2 contact probability. (**B-D**) Subtraction matrices between the regions were plotted as heatmaps (bin size= 2 kb). The regions are mentioned on the top of each heatmap. Color bars denote differences in contact probabilities between regions.


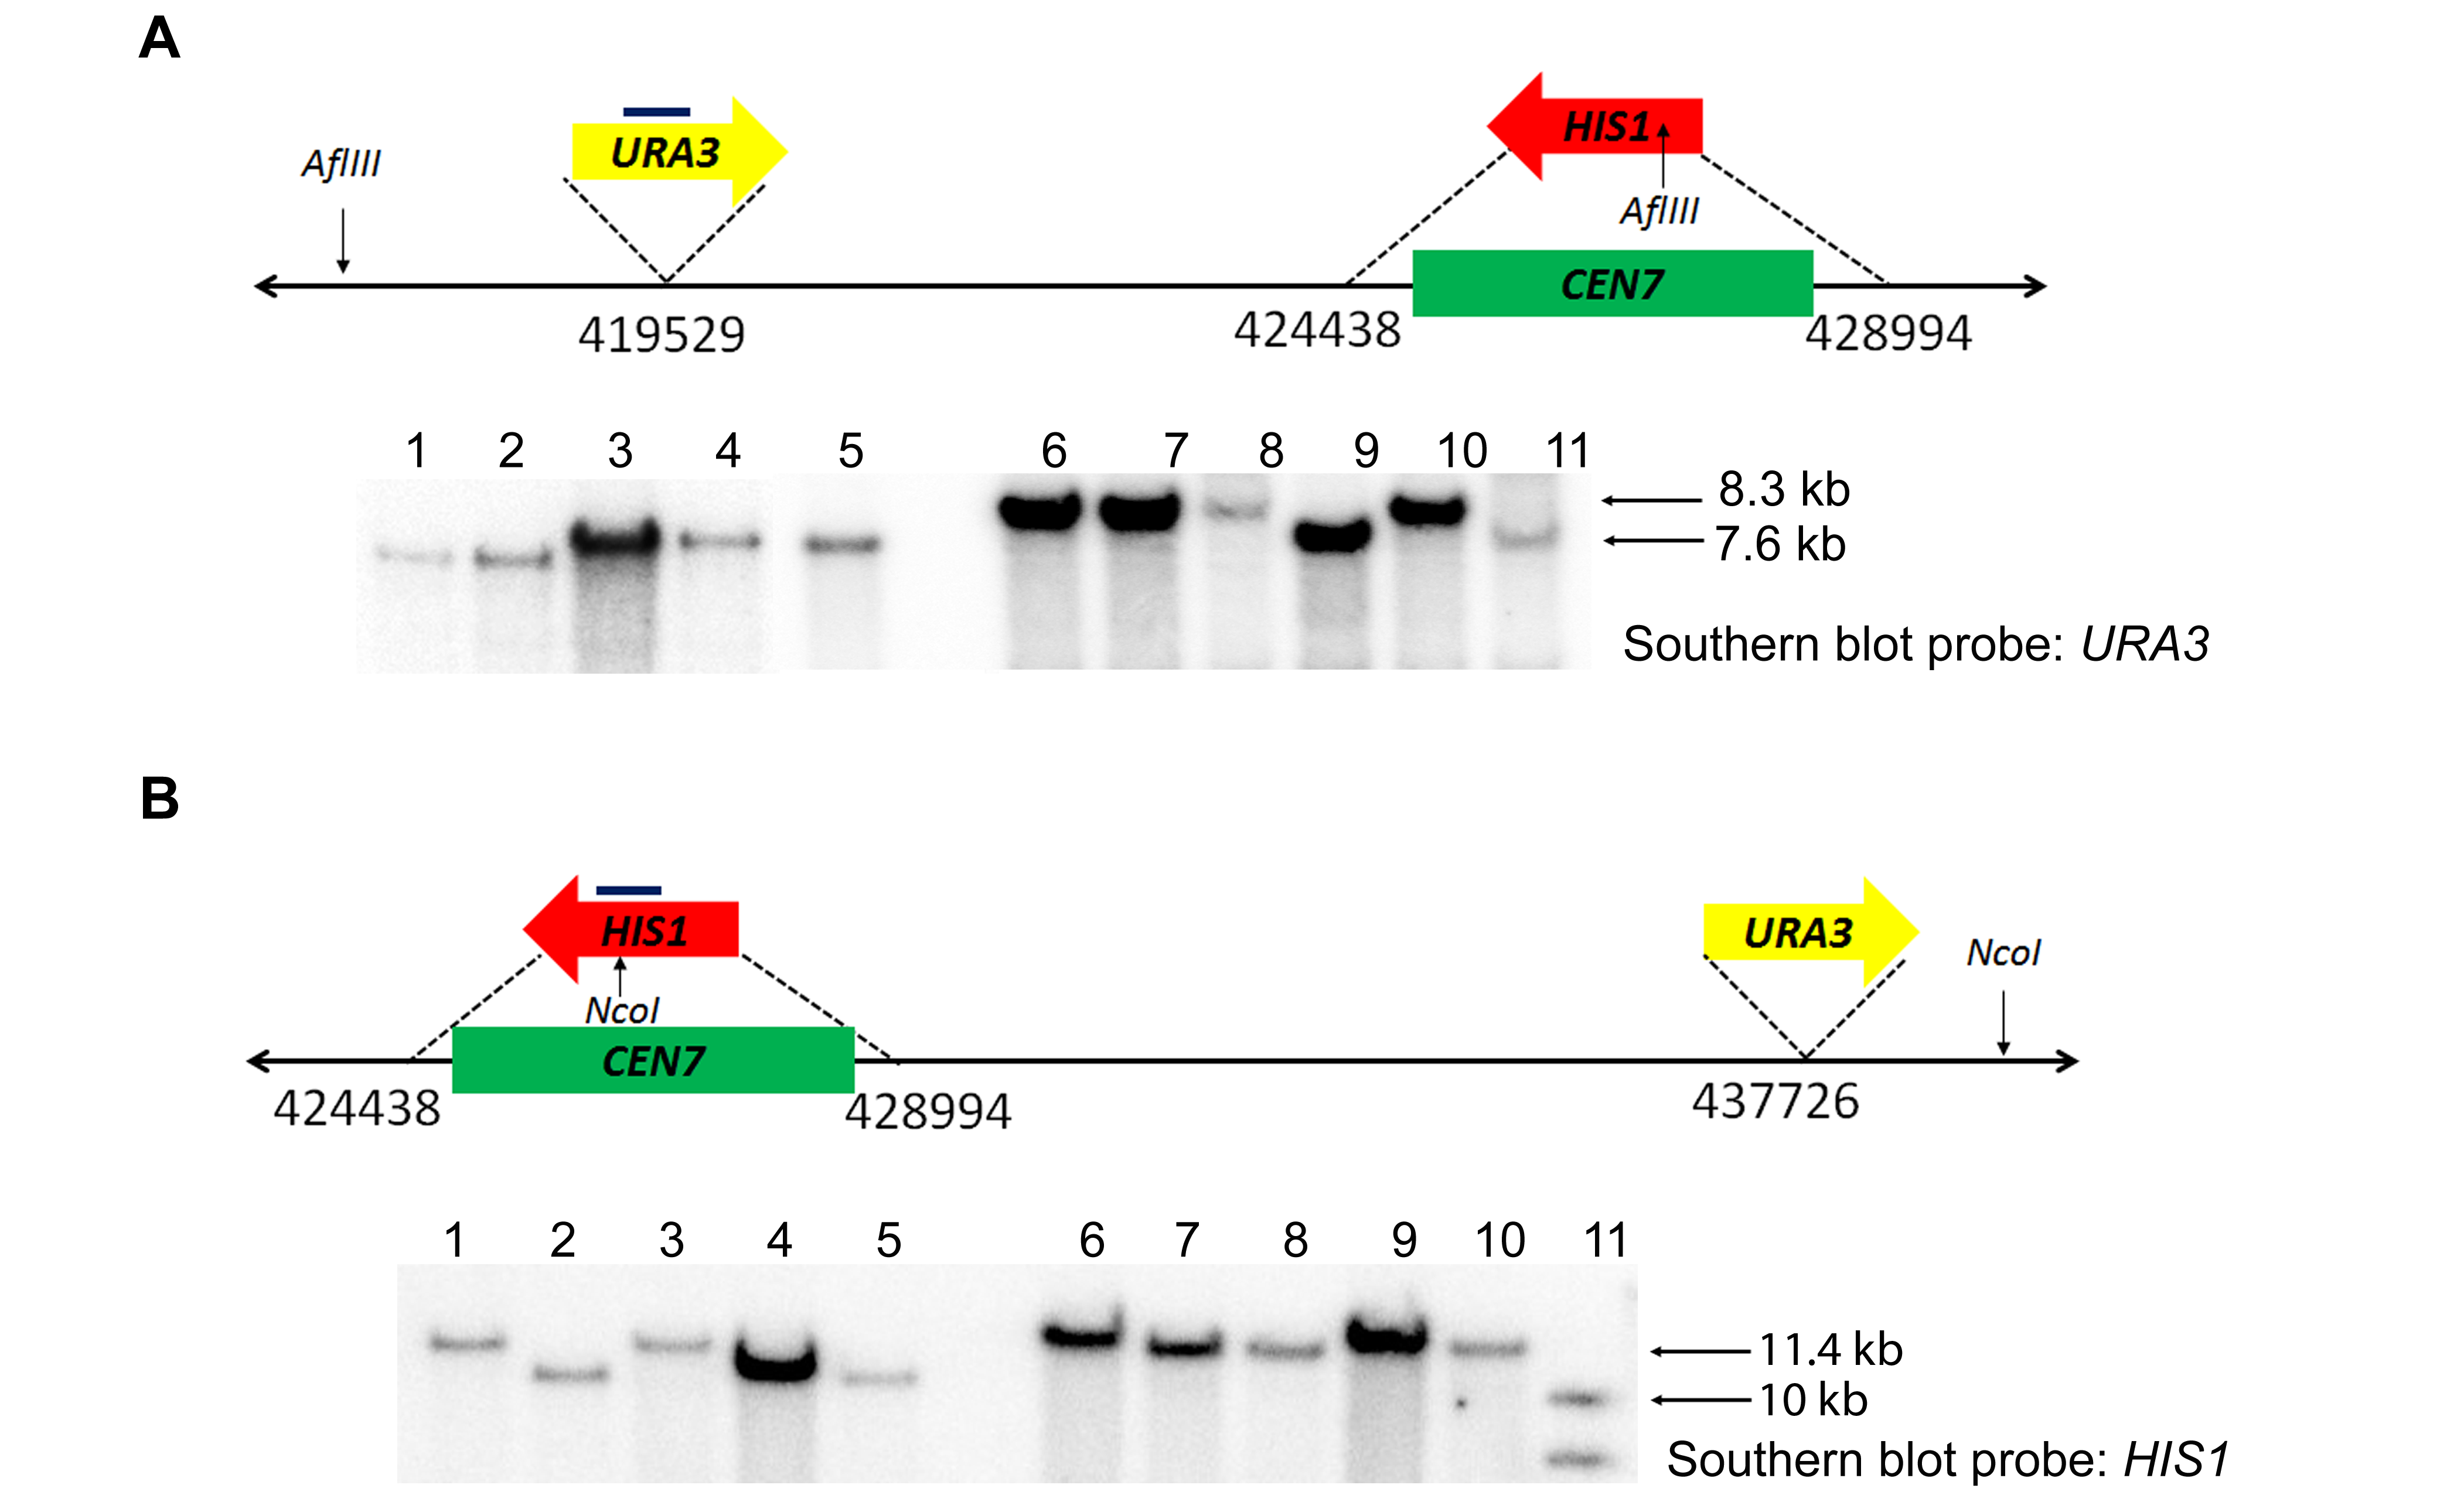


**Figure S2. Southern analysis of *CEN7* deleted strains. (A)** A line diagram showing restriction sites of pericentromeres of Chr7 when *URA3* (yellow arrow) is located at L4 at a site 7.7 kb left of *CEN7*. *CEN7* (Ca21Chr7 424475-428993) (green) has been replaced by *HIS1* (red). Genomic DNA from strains LSK445, LSK446, LSK 447, LSK 448, LSK449, LSK450, LSK451, LSK452, LSK453, LSK454 and LSK455 (lanes 1-11) were digested with *Afl*III, Southern hybridized and probed with a *URA3* fragment. The desired band of 8.3 kb suggests the presence of *URA3* and *HIS1* on the same homolog of Chr7. **(B)** A line diagram showing restriction digestion of pericentromeres of Chr7 when *URA3* is located at R4 at a site 10.4 kb right of *CEN7*. *CEN7* (Ca21Chr7 424475-428993) has been replaced by *HIS1*. Genomic DNA from strains LSK459, LSK460, LSK461, LSK462, LSK463, LSK464, LSK465, LSK466, LSK467 and LSK468 (lanes 1-10) were digested with *Nco*I, Southern hybridized and probed with a *HIS1* fragment. The desired band of 11.4 kb suggests the presence of *URA3* and *HIS1* on the same homolog of Chr7.


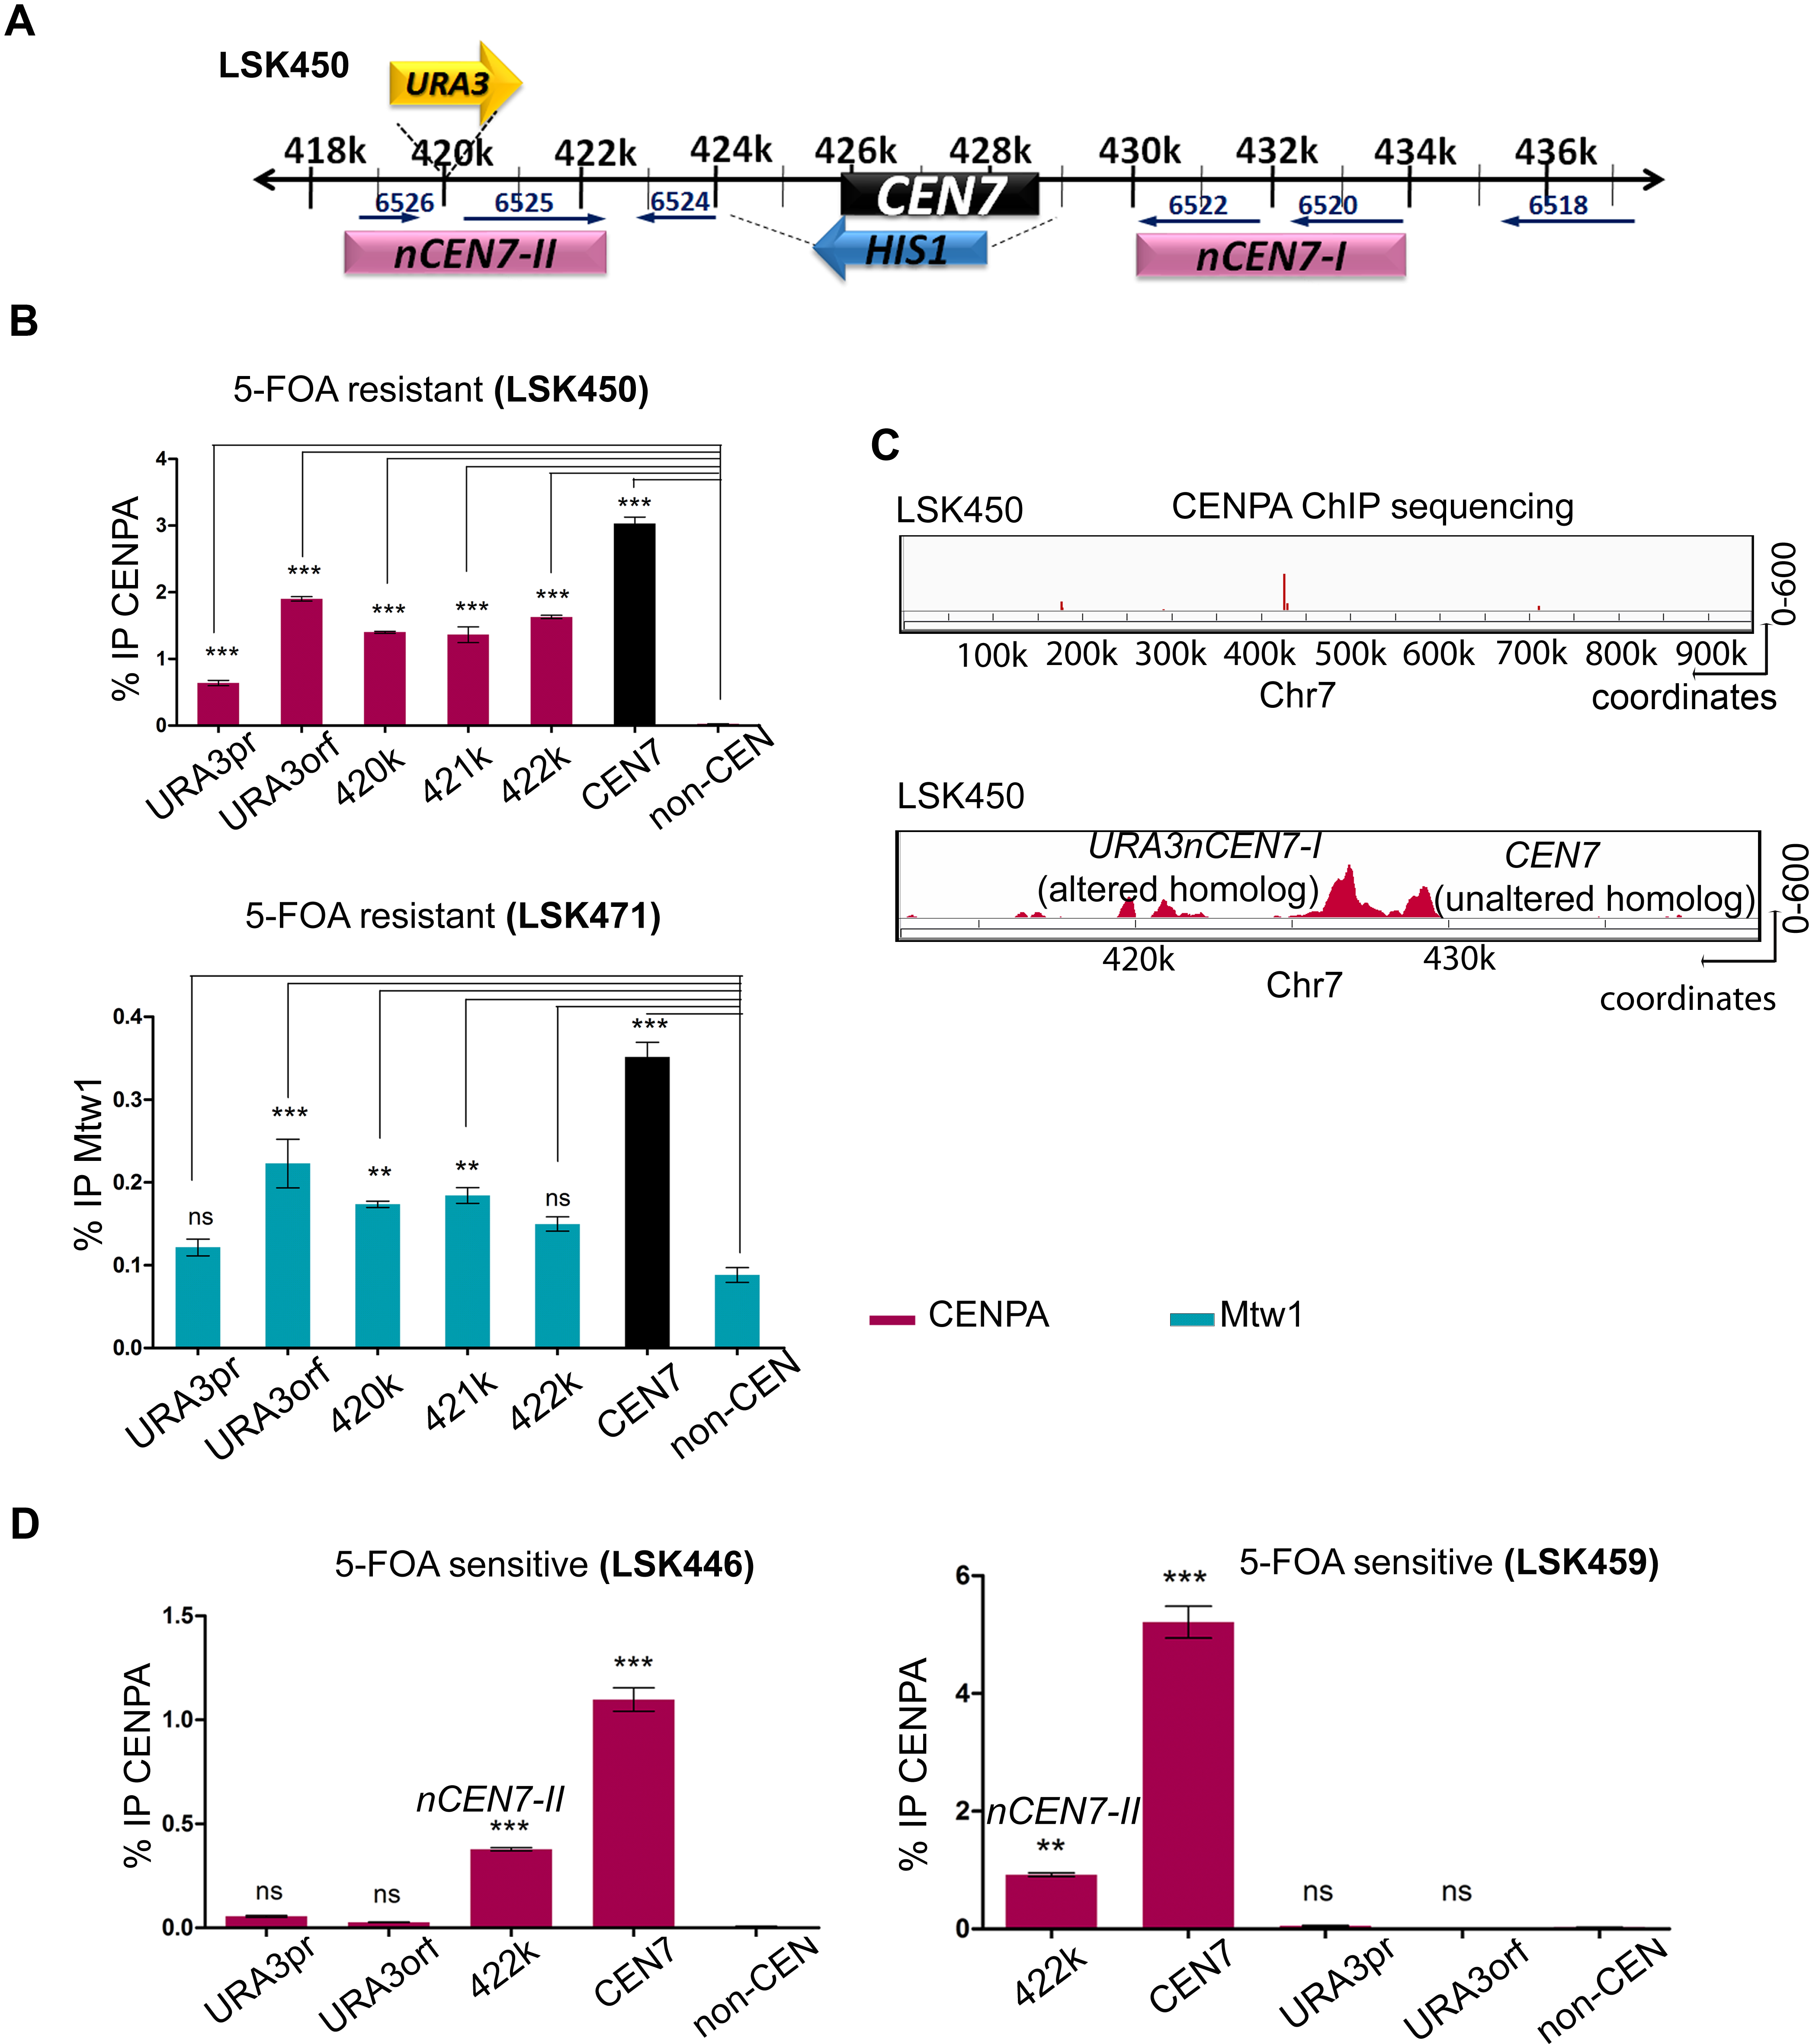


**Figure S3. Neocentromeres form within the 25 kb CFCC. (A)** In the diploid *C. albicans*, only one homolog of Chr7 where *CEN7* (Ca21Chr7 424475-428994) has been replaced with *HIS1* in a *URA3* integrant (Ca21Chr7 419529-419530) is shown. **(B)** Relative enrichment of CENPA at native *CEN7* from the unaltered homolog (black) and the neocentromere locus, *URA3nCEN7-I* (red) in the 5-FOA resistant strain LSK450 (*CSE4/CSE4-GFP-CSE4 L4/L4::URA3 CEN7/CEN7::HIS1)* (*top*). Relative enrichment of Mtw1 at *CEN7* (black bar) and *URA3nCEN7-I* (blue) at the native centromere (427k) in LSK471 *(CSE4/CSE4-GFP-CSE4 L4/L4::URA3 CEN7/CEN7::HIS1MTW1/MTW1-TAP)* (*bottom*). Relative enrichment profiles of CENPA and Mtw1 indicate that the neocentromere formed on the *CEN7* deleted homolog (*URA3nCEN7-II*) was mapped to a region surrounding the integration locus (Ca21Chr7 435078-440387) (***p<0.001, ** p<0.01, ns p>0.05). **(C)** CENPA ChIP-sequencing confirmed the presence of the neocentromere in the strain LSK450, where the profile is a combination of two peaks, the one at *CEN7* is on the unaltered homolog the one at *URA3nCEN7-I* is on the altered CEN7 deleted homolog. A 30 kb region harboring *CEN7* depicts the track height (as on IGV) on the *y*-axis and coordinates on the *x*-axis. **(D)** CENPA ChIP followed by qPCR in the 5-FOA-sensitive strains LSK446 (*CSE4/CSE4-GFP-CSE4 L4/L4::URA3 CEN7/CEN7::HIS1)* (*left*) and LSK459 (*CSE4/CSE4-GFP-CSE4 R4/R4::URA3 CEN7/CEN7::HIS1)* (*right*) indicates that neocentromeres are activated at the previously identified hotspot *nCEN7-II*. There was no significant CENPA enrichment detected on *URA3*. The experiment was performed in two independent transformants for each type of neocentric strain. Statistical significance was determined by one-way ANOVA followed by Bonferroni post-test (*** p<0.001, ** p<0.01, ns: p>0.05).

**Table S1. Coordinates for *URA3* integration sites in *C. albicans***

| **TYPE OF INSERTION** | **COORDINATE OF INSERTION** | **DISTANCE FROM MID-CEN** |
| --- | --- | --- |
| L5 | Ca21Chr7 417202-417203 | 10 kb (left of CEN7) |
| L4 | Ca21Chr7 419529-419530 | 7.7 kb (left of CEN7) |
| L3 | Ca21Chr7 422037-422038 | 5.2 kb (left of CEN7) |
| L2 | Ca21Chr7 423682-423683 | 3.5 kb (left of CEN7) |
| L1 | Ca21Chr7 425563-425564 | 1.7 kb (left of CEN7) |
| R1 | Ca21Chr7 429198-429199 | 1.9 kb (right of CEN7) |
| R2 | Ca21Chr7 432145-432146 | 4.9 kb (right of CEN7) |
| R3 | Ca21Chr7 434069-434070 | 6.8 kb (right of CEN7) |
| R4 | Ca21Chr7 437729-437730 | 10.4 kb (right of CEN7) |
| R5 | Ca21Chr7 443546-443547 | 16.2 kb (right of CEN7) |
| far-CEN7 | Ca21Chr7 299510-299511 | 127 kb (left of CEN7) |
| CEN5int | Ca21Chr5 477918-477919 | 7.5 kb (right of CEN5) |

**Table S2. Southern blot strategy for *CEN7* deleted strains**

| **STRAIN** | **RESTRICTION ENZYME** | **PRIMERS USED TO AMPLIFY PROBE (LENGTH OF PROBE)** | **SIZE OF THE EXPECTED BAND/WILD TYPE** |
| --- | --- | --- | --- |
| 4.5 kb *CEN7* deletion in URA3 at L4 locus (LSK450) | *Afl*III | URAR3T1, URA3 RT4  (870 bp) | 8.3/7.6 kb |
| 4.5 kb *CEN7* deletion in *URA3* at R4 locus (LSK465) | *Nco*I | HIS ORF_2, HIS ORF_1  (480 bp) | 11.4/10 kb |

**Table S3. Neocentromere coordinates of *CEN7* deleted strains (from CENPA ChIP-sequencing analysis)**

| **STRAIN** | **DESCRIPTION** | **COORDINATES FOR NEOCENTROMERE** |
| --- | --- | --- |
| LSK450 | 4.5 kb *CEN7* deleted in 5-FOA resistant *URA3* integrant (R4) | Ca21Chr7 419629-422084 |
| LSK465 | 4.5 kb *CEN7* deleted in 5-FOA resistant *URA3* integrant (L4) | Ca21Chr7 435078-440387 |

**Table S4. Strains used in the study**

| **NAME** | **GENOTYPE** | **DESCRIPTION** | **REFERENCE** |
| --- | --- | --- | --- |
| J200 | *Δura3::imm434/ Δura3::imm434 Δhis1::hisG/ Δhis1::hisG arg4::HIS1*/*ARG4 CSE4/CSE4-TAP(NAT)* | *CSE4-TAP(NAT)* in RM1000AH | ([Thakur and Sanyal 2013](#_ENREF_2)) |
| 8675 | *Δura3::imm434/Δura3::imm434, Δhis1::hisG/Δhis1::hisG ,Δarg4::hisG/Δarg4::hisG, CSE4-GFP-CSE4/CSE4* | *CSE4-GFP-CSE4/CSE4* | ([Joglekar *et al.* 2008](#_ENREF_1)) |
| LSK401 | *Δura3::imm434/ Δura3::imm434 Δhis1::hisG/ Δhis1::hisG arg4::HIS1/ARG4 L5/L5::URA3 CSE4/CSE4-TAP(NAT)* | L5_T1 | This study |
| LSK402 | *Δura3::imm434/ Δura3::imm434 Δhis1::hisG/ Δhis1::hisG arg4::HIS1/ARG4 L5/L5::URA3 CSE4/CSE4-TAP(NAT)* | L5_T2 | This study |
| LSK403 | *Δura3::imm434/ Δura3::imm434 Δhis1::hisG/ Δhis1::hisG arg4::HIS1/ARG4 L5/L5::URA3 CSE4/CSE4-TAP(NAT)* | L5_T3 | This study |
| LSK404 | *Δura3::imm434/ Δura3::imm434 Δhis1::hisG/ Δhis1::hisG arg4::HIS1/ARG4 L4/L4::URA3CSE4/CSE4-TAP(NAT)* | L4_T1 | This study |
| LSK405 | *Δura3::imm434/ Δura3::imm434 Δhis1::hisG/ Δhis1::hisG arg4::HIS1/ARG4 L4/L4::URA3CSE4/CSE4-TAP(NAT)* | L4_T2 | This study |
| LSK406 | *Δura3::imm434/ Δura3::imm434 Δhis1::hisG/ Δhis1::hisG arg4::HIS1/ARG4 L4/L4::URA3 CSE4/CSE4 -TAP(NAT)* | L4_T3 | This study |
| LSK407 | *Δura3::imm434/ Δura3::imm434 Δhis1::hisG/ Δhis1::hisG arg4::HIS1/ARG4 L3/L3::URA3 CSE4/CSE4-TAP(NAT)* | L3_T1 | This study |
| LSK408 | *Δura3::imm434/ Δura3::imm434 Δhis1::hisG/ Δhis1::hisG arg4::HIS1/ARG4 L3/L3::URA3 CSE4/CSE4-TAP(NAT)* | L3_T2 | This study |
| LSK409 | *Δura3::imm434/ Δura3::imm434 Δhis1::hisG/ Δhis1::hisG arg4::HIS1/ARG4 L3/L3::URA3 CSE4/CSE4-TAP(NAT)* | L3_T3 | This study |
| LSK410 | *Δura3::imm434/ Δura3::imm434 Δhis1::hisG/ Δhis1::hisG arg4::HIS1/ARG4 L2/L2::URA3 CSE4/CSE4-TAP(NAT)* | L2_T1 | This study |
| LSK411 | *Δura3::imm434/ Δura3::imm434 Δhis1::hisG/ Δhis1::hisG arg4::HIS1/ARG4 L2/L2::URA3 CSE4/CSE4-TAP(NAT)* | L2_T2 | This study |
| LSK412 | *Δura3::imm434/ Δura3::imm434 Δhis1::hisG/ Δhis1::hisG arg4::HIS1/ARG4 L2/L2::URA3 CSE4/CSE4-TAP(NAT)* | L2_T3 | This study |
| LSK413 | *Δura3::imm434/ Δura3::imm434 Δhis1::hisG/ Δhis1::hisG arg4::HIS1/ARG4 L1/L1::URA3 CSE4/CSE4-TAP(NAT)* | L1_T1 | This study |
| LSK414 | *Δura3::imm434/ Δura3::imm434 Δhis1::hisG/ Δhis1::hisG arg4::HIS1/ARG4 L1/L1::URA3 CSE4/CSE4-TAP(NAT)* | L1_T2 | This study |
| LSK415 | *Δura3::imm434/ Δura3::imm434 Δhis1::hisG/ Δhis1::hisG arg4::HIS1/ARG4 L1/L1::URA3 CSE4/CSE4TAP(NAT)* | L1_T3 | This study |
| J151 | *Δura3::imm434/ Δura3::imm434 Δhis1::hisG/ Δhis1::hisG arg4::HIS1/ARG4 CEN7/CEN7::URA3 CSE4/CSE4-TAP(NAT)* | CEN7::URA3_T1 | ([Thakur and Sanyal 2013](#_ENREF_2)) |
| J153 | *Δura3::imm434/ Δura3::imm434 Δhis1::hisG/ Δhis1::hisG arg4::HIS1/ARG4 CEN7/CEN7::URA3 CSE4/CSE4-TAP(NAT)* | CEN7::URA3_T2 | ([Thakur and Sanyal 2013](#_ENREF_2)) |
| J154 | *Δura3::imm434/ Δura3::imm434 Δhis1::hisG/ Δhis1::hisG arg4::HIS1/ARG4 CEN7/CEN7::URA3 CSE4/CSE4-TAP(NAT)* | CEN7::URA3_T3 | ([Thakur and Sanyal 2013](#_ENREF_2)) |
| LSK416 | *Δura3::imm434/ Δura3::imm434 Δhis1::hisG/ Δhis1::hisG arg4::HIS1/ARG4 R1/R1::URA3 CSE4/CSE4-TAP(NAT)* | R1_T1 | This study |
| LSK417 | *Δura3::imm434/ Δura3::imm434 Δhis1::hisG/ Δhis1::hisG arg4::HIS1/ARG4 R1/R1::URA3 CSE4/CSE4-TAP(NAT)* | R1_T2 | This study |
| LSK418 | *Δura3::imm434/ Δura3::imm434 Δhis1::hisG/ Δhis1::hisG arg4::HIS1/ARG4 R1/R1::URA3 CSE4/CSE4-TAP(NAT)* | R1_T3 | This study |
| LSK419 | *Δura3::imm434/ Δura3::imm434 Δhis1::hisG/ Δhis1::hisG arg4::HIS1/ARG4 R2/R2::URA3 CSE4/CSE4-TAP(NAT)* | R2_T1 | This study |
| LSK420 | *Δura3::imm434/ Δura3::imm434 Δhis1::hisG/ Δhis1::hisG arg4::HIS1/ARG4 R2/R2::URA3 CSE4/CSE4-TAP(NAT)* | R2_T2 | This study |
| LSK421 | *Δura3::imm434/ Δura3::imm434 Δhis1::hisG/ Δhis1::hisG arg4::HIS1/ARG4 R2/R2::URA3 CSE4/CSE4-TAP(NAT)* | R2_T3 | This study |
| LSK422 | *Δura3::imm434/ Δura3::imm434 Δhis1::hisG/ Δhis1::hisG arg4::HIS1/ARG4 R3/R3::URA3 CSE4/CSE4-TAP(NAT)* | R3_T1 | This study |
| LSK423 | *Δura3::imm434/ Δura3::imm434 Δhis1::hisG/ Δhis1::hisG arg4::HIS1/ARG4 R3/R3::URA3 CSE4/CSE4-TAP(NAT)* | R3_T2 | This study |
| LSK424 | *Δura3::imm434/ Δura3::imm434 Δhis1::hisG/ Δhis1::hisG arg4::HIS1/ARG4 R3/R3::URA3 CSE4/CSE4-TAP(NAT)* | R3_T3 | This study |
| LSK425 | *Δura3::imm434/ Δura3::imm434 Δhis1::hisG/ Δhis1::hisG arg4::HIS1/ARG4 R4/R4::URA3 CSE4/CSE4-TAP(NAT)* | R4_T1 | This study |
| LSK426 | *Δura3::imm434/ Δura3::imm434 Δhis1::hisG/ Δhis1::hisG arg4::HIS1/ARG4 R4/R4::URA3 CSE4/CSE4-TAP(NAT)* | R4_T2 | This study |
| LSK427 | *Δura3::imm434/ Δura3::imm434 Δhis1::hisG/ Δhis1::hisG arg4::HIS1/ARG4 R4/R4::URA3 CSE4/CSE4-TAP(NAT)* | R4_T3 | This study |
| LSK427 | *Δura3::imm434/ Δura3::imm434 Δhis1::hisG/ Δhis1::hisG arg4::HIS1/ARG4 R5/R5::URA3 CSE4/CSE4-TAP(NAT)* | R5_T1 | This study |
| LSK428 | *Δura3::imm434/ Δura3::imm434 Δhis1::hisG/ Δhis1::hisG arg4::HIS1/ARG4 R5/R5::URA3 CSE4/CSE4-TAP(NAT)* | R5_T2 | This study |
| LSK430 | *Δura3::imm434/ Δura3::imm434 Δhis1::hisG/ Δhis1::hisG arg4::HIS1/ARG4 CEN5/CEN5-7 kb_right ::URA3 CSE4/CSE4TAP(NAT)* | CEN5_T1 | This study |
| LSK431 | *Δura3::imm434/ Δura3::imm434 Δhis1::hisG/ Δhis1::hisG arg4::HIS1/ARG4 CEN5/CEN5-7 kb_right ::URA3 CSE4/CSE4-TAP(NAT)* | CEN5_T2 | This study |
| LSK432 | *Δura3::imm434/ Δura3::imm434 Δhis1::hisG/ Δhis1::hisG arg4::HIS1/ARG4 CEN5/CEN5-7 kb_right ::URA3 CSE4/CSE4-TAP(NAT)* | CEN5_T3 | This study |
| LSK433 | *Δura3::imm434/ Δura3::imm434 Δhis1::hisG/ Δhis1::hisG arg4::HIS1/ARG4 CEN7::URA3_ 127 kb farCEN/ CEN7 CSE4/CSE4-TAP(NAT)* | FAR URA_T1 | This study |
| LSK434 | *Δura3::imm434/ Δura3::imm434 Δhis1::hisG/ Δhis1::hisG arg4::HIS1/ARG4 CEN7::URA3_ 127 kb farCEN/ CEN7 CSE4/CSE4-TAP(NAT)* | FAR URA_T2 | This study |
| LSK435 | *Δura3::imm434/ Δura3::imm434 Δhis1::hisG/ Δhis1::hisG arg4::HIS1/ARG4 CEN7::URA3_ 127 kb farCEN/ CEN7 CSE4/CSE4-TAP(NAT)* | FAR URA_T3 | This study |
| LSK443 | *Δura3::imm434/Δura3::imm434, Δhis1::hisG/Δhis1::hisG ,Δarg4::hisG/Δarg4::hisG, L4/L4::URA3CSE4/CSE4-GFP-CSE4* | L4 inCse4-GFP_T1 | This study |
| LSK444 | *Δura3::imm434/Δura3::imm434, Δhis1::hisG/Δhis1::hisG ,Δarg4::hisG/Δarg4::hisG, L4/L4::URA3CSE4/CSE4-GFP-CSE4* | L4 in Cse4-GFP_T2 | This study |
| LSK445 | *Δura3::imm434/Δura3::imm434, Δhis1::hisG/Δhis1::hisG ,Δarg4::hisG/Δarg4::hisG, L4/L4::URA3CSE4/CSE4-GFP-CSE4* | L4 in Cse4-GFP_T3 | This study |
| LSK446 | *Δura3::imm434/Δura3::imm434, Δhis1::hisG/Δhis1::hisG ,Δarg4::hisG/Δarg4::hisG, L4/L4::URA3CSE4/CSE4-GFP-CSE4CEN7/CEN7::HIS1* | CEN7 del in L4 (FOAs, in *cis)* | This study |
| LSK447 | *Δura3::imm434/Δura3::imm434, Δhis1::hisG/Δhis1::hisG ,Δarg4::hisG/Δarg4::hisG, L4/L4::URA3CSE4/CSE4-GFP-CSE4CEN7/CEN7::HIS1* | CEN7 del in L4 (FOAs, in *cis)* | This study |
| LSK448 | *Δura3::imm434/Δura3::imm434, Δhis1::hisG/Δhis1::hisG ,Δarg4::hisG/Δarg4::hisG, L4/L4::URA3CSE4/CSE4-GFP-CSE4CEN7/CEN7::HIS1* | CEN7 del in L4(FOAs, in *trans)* | This study |
| LSK449 | *Δura3::imm434/Δura3::imm434, Δhis1::hisG/Δhis1::hisG ,Δarg4::hisG/Δarg4::hisG, L4/L4::URA3CSE4/CSE4-GFP-CSE4CEN7/CEN7::HIS1* | CEN7 del in L4 (FOAs, in *trans)* | This study |
| LSK450 | *Δura3::imm434/Δura3::imm434, Δhis1::hisG/Δhis1::hisG ,Δarg4::hisG/Δarg4::hisG, L4/L4::URA3CSE4/CSE4-GFP-CSE4CEN7/CEN7::HIS1* | CEN7 del in L4 (FOAr, in *cis)* | This study |
| LSK451 | *Δura3::imm434/Δura3::imm434, Δhis1::hisG/Δhis1::hisG ,Δarg4::hisG/Δarg4::hisG, L4/L4::URA3CSE4/CSE4-GFP-CSE4CEN7/CEN7::HIS1* | CEN7 del in L4 (FOAr, in *cis)* | This study |
| LSK452 | *Δura3::imm434/Δura3::imm434, Δhis1::hisG/Δhis1::hisG ,Δarg4::hisG/Δarg4::hisG, L4/L4::URA3CSE4/CSE4-GFP-CSE4CEN7/CEN7::HIS1* | CEN7 del in L4 (FOAr, in *trans)* | This study |
| LSK453 | *Δura3::imm434/Δura3::imm434, Δhis1::hisG/Δhis1::hisG ,Δarg4::hisG/Δarg4::hisG, CEN7/CEN7::HIS1::URA3_7.7kb left CSE4-GFP-CSE4/CSE4* | CEN7 del in L4 (FOAr, in *trans)* | This study |
| LSK454 | *Δura3::imm434/Δura3::imm434, Δhis1::hisG/Δhis1::hisG ,Δarg4::hisG/Δarg4::hisG, L4/L4::URA3CSE4/CSE4-GFP-CSE4CEN7/CEN7::HIS1* | CEN7 del in L4 (FOAr, in *trans)* | This study |
| LSK455 | *Δura3::imm434/Δura3::imm434, Δhis1::hisG/Δhis1::hisG ,Δarg4::hisG/Δarg4::hisG, L4/L4::URA3CSE4/CSE4-GFP-CSE4CEN7/CEN7::HIS1* | CEN7 del in L4 (FOAr, in *trans)* | This study |
| LSK456 | *Δura3::imm434/Δura3::imm434, Δhis1::hisG/Δhis1::hisG ,Δarg4::hisG/Δarg4::hisG, R4/R4::URA3CSE4/CSE4-GFP-CSE4* | R4 in Cse4-GFP_T1 | This study |
| LSK457 | *Δura3::imm434/Δura3::imm434, Δhis1::hisG/Δhis1::hisG ,Δarg4::hisG/Δarg4::hisG, R4/R4::URA3CSE4/CSE4-GFP-CSE4* | R4 in Cse4-GFP_T2 | This study |
| LSK458 | *Δura3::imm434/Δura3::imm434, Δhis1::hisG/Δhis1::hisG ,Δarg4::hisG/Δarg4::hisG, R4/R4::URA3CSE4/CSE4-GFP-CSE4* | R4 in Cse4-GFP_T3 | This study |
| LSK459 | *Δura3::imm434/Δura3::imm434, Δhis1::hisG/Δhis1::hisG ,Δarg4::hisG/Δarg4::hisG, R4/R4::URA3CSE4/CSE4-GFP-CSE4CEN7/CEN7::HIS1* | CEN7 del in R4 (FOAs, in *cis)* | This study |
| LSK460 | *Δura3::imm434/Δura3::imm434, Δhis1::hisG/Δhis1::hisG ,Δarg4::hisG/Δarg4::hisG, R4/R4::URA3CSE4/CSE4-GFP-CSE4CEN7/CEN7::HIS1* | CEN7 del in R4 (FOAs, in *cis)* | This study |
| LSK461 | *Δura3::imm434/Δura3::imm434, Δhis1::hisG/Δhis1::hisG ,Δarg4::hisG/Δarg4::hisG, R4/R4::URA3CSE4/CSE4-GFP-CSE4CEN7/CEN7::HIS1* | CEN7 del in R4 (FOAs, in *cis)* | This study |
| LSK462 | *Δura3::imm434/Δura3::imm434, Δhis1::hisG/Δhis1::hisG ,Δarg4::hisG/Δarg4::hisG, R4/R4::URA3CSE4/CSE4-GFP-CSE4CEN7/CEN7::HIS1* | CEN7 del in R4 (FOAs, in *trans)* | This study |
| LSK463 | *Δura3::imm434/Δura3::imm434, Δhis1::hisG/Δhis1::hisG ,Δarg4::hisG/Δarg4::hisG, R4/R4::URA3CSE4/CSE4-GFP-CSE4CEN7/CEN7::HIS1* | CEN7 del in R4 (FOAs, in *trans)* | This study |
| LSK464 | *Δura3::imm434/Δura3::imm434, Δhis1::hisG/Δhis1::hisG ,Δarg4::hisG/Δarg4::hisG, R4/R4::URA3CSE4/CSE4-GFP-CSE4CEN7/CEN7::HIS1* | CEN7 del in R4 (FOAr, in *cis)* | This study |
| LSK465 | *Δura3::imm434/Δura3::imm434, Δhis1::hisG/Δhis1::hisG ,Δarg4::hisG/Δarg4::hisG, R4/R4::URA3CSE4/CSE4-GFP-CSE4CEN7/CEN7::HIS1* | CEN7 del in R4 (FOAr, in *cis)* | This study |
| LSK466 | *Δura3::imm434/Δura3::imm434, Δhis1::hisG/Δhis1::hisG ,Δarg4::hisG/Δarg4::hisG, R4/R4::URA3CSE4/CSE4-GFP-CSE4CEN7/CEN7::HIS1* | CEN7 del in R4 (FOAr, in *cis)* | This study |
| LSK467 | *Δura3::imm434/Δura3::imm434, Δhis1::hisG/Δhis1::hisG ,Δarg4::hisG/Δarg4::hisG, R4/R4::URA3CSE4/CSE4-GFP-CSE4CEN7/CEN7::HIS1* | CEN7 del in R4 (FOAr, in *trans)* | This study |
| LSK468 | *Δura3::imm434/Δura3::imm434, Δhis1::hisG/Δhis1::hisG ,Δarg4::hisG/Δarg4::hisG, R4/R4::URA3CSE4/CSE4-GFP-CSE4CEN7/CEN7::HIS1* | CEN7 del in R4 (FOAr, in *trans)* | This study |
| LSK471 | *Δura3::imm434/Δura3::imm434, Δhis1::hisG/Δhis1::hisG ,Δarg4::hisG/Δarg4::hisG, L4/L4::URA3CSE4/CSE4-GFP-CSE4*  *CEN7/CEN7::HIS1MTW1/MTW1-TAP(NAT)* | CEN7 del in L4 (FOAr, in *cis)*  MTW1-TAP | This study |
| LSK472 | *Δura3::imm434/Δura3::imm434, Δhis1::hisG/Δhis1::hisG ,Δarg4::hisG/Δarg4::hisG, L4/L4::URA3CSE4/CSE4-GFP-CSE4*  *CEN7/CEN7::HIS1MTW1/MTW1-TAP(NAT)* | CEN7 del in L4 (FOAr, in *cis)* MTW1-TAP | This study |
| LSK475 | *Δura3::imm434/Δura3::imm434, Δhis1::hisG/Δhis1::hisG ,Δarg4::hisG/Δarg4::hisG, R4/R4::URA3CSE4/CSE4-GFP-CSE4*  *CEN7/CEN7::HIS1MTW1/MTW1-TAP(NAT)* | CEN7 del in R4 (FOAr, in *cis)* MTW1-TAP | This study |
| LSK476 | *Δura3::imm434/Δura3::imm434, Δhis1::hisG/Δhis1::hisG ,Δarg4::hisG/Δarg4::hisG, R4/R4::URA3CSE4/CSE4-GFP-CSE4*  *CEN7/CEN7::HIS1MTW1/MTW1-TAP(NAT)* | CEN7 del in R4 (FOAr, in *cis)* MTW1-TAP | This study |

**Table S5. Primers used in the study**

| **Name** | **Sequence** | **Description** |
| --- | --- | --- |
| URA3 EXT HSP2_FP | GTTTCAGAATCCGAAAAAGTGACGAAACTTATCATAATTGTACGAATATTCTTATCAAACACACCCTGAGCTTCCGGATAATAGGAATTG | Cassette primers for *URA3* integrated 10 kb left of CEN7 |
| URA3 EXT HSP2_RP | GTTGCTCGAGGTTAGAGTCTATCTTGAAAAATTTTGTACATACAAACTGATATAACTCGACAATGGTCTTAGAAGGACCACCTTTGATTG |
| URA3 AT HSP2_FP | CTCAAAAATACTTTAACAAACGGGTATATTGCTGATATTCTGATTAAAACATTTGATCGTTTTATGTGAGCTTCCGGATAATAGGAATTG | Cassette primers for *URA3* integrated 7.7 kb left of CEN7 |
| URA3 AT HSP2_RP | CTTAACCCCAGACAGTTTTAACAATTTAGACACTACTACTAATTGCAACGTACTAACTAGTGAAACCCTTAGAAGGACCACCTTTGATTG |
| 19.6520_AvrII_F | AAACCCCCTAGGTTGCGAATATCTATTG | Construction of pFA-URA3-I-SceI-TS-Orf 19.6520/65 |
| 19.6520_HindIII_MluI_R | AAACCCAAGCTTACGCGTAATGGTCCCATCAGCAGTGCA |
| 19.6522_HpaI_MluI_F | CCCAAAGTTAACACGCGTCTGCCAACAAGAATGCAACT |
| 19.6522_SacII_R | CCCAAACCGCGGTATATTTTTGTTGTATCAGAATCCTACGCC |
| L1_URA INT_FP | CACATATTTTTACTTTCTGTATTATTCAGATCTTTACTCGTTGAAAAAAAATTTTTTTTTTCAAAAGCTTCCGGATAATAGGAATTG | Cassette primers for *URA3* integrated 3.5 kb left of CEN7 |
| L1_URA INT_RP | GATGTAGTTGTATCTTTAATATCACAGTTATGATAAGGGTCGTGTATATGTGAACATGGATTTGCTTAGAAGGACCACCTTTGATTG |
| PJ71 | TGCTTACCATAATAGATGCTTAAAGCAACTAAAATTAAGCTACTGGAAAGCTCCAGTGGTCCTAGATCCCGACTAATAGG | Cassette primers for *URA3* integrated 1.7 kb left of CEN7 |
| PJ72 | ATTCGGGCAATTGTGTTCGTTATTGGTGGTAAATAATGGTAAGACTACTTGGCACATGTATAGAAGGACCACCTTTGATTG |
| PJ67 | ATTGATTGAATTTATAGCGGAAAATGGATGACAATTAAAGGTTACGTGACGCTTTTTGCTCCTAGATCCCGACTAATAGG | Cassette primers for *URA3* integrated 1.9 kb right of CEN7 |
| PJ68 | CTACATTTTCATGGACCAAACCCACTACAACACATGCACCACACTGCACCTCCCCTAAAATAGAAGGACCACCTTTGATTG |
| R1_URA INT_FP | GTCAGAAATTGATTTATGGACGAGATAAGACTAAAATATGATTCTTCTAAAATCACATAATTAATTAGAGCTTCCGGATAATAGGAATTG | Cassette primers for *URA3* integrated 6.5 kb right of CEN7 |
| R1_URA INT_RP | GTGTAACAAAAATTTGCAATCACATCATTGACAGCCACCACAGTTTTTTTATAATAAGTGATATTGTTAGAAGGACCACCTTTGATTG |
| PJ70 | TTGCTTTAAATGTTTCAAACCATAGGTATGAGTTTGGGTAGTATTTGGCGGAATTAATGTCCTAGATCCCGACTAATAGG | Cassette primers for *URA3* integrated 10.4 kb right of CEN7 |
| PJ71 | ATCACTCTTGTCGTTTATTGTAGATCACTAAAAGTAATGGTTGTGTGAATAACTCCTGCTTAGAAGGACCACCTTTGATTG |
| URA3 AT HSP3_FP | CAGTTTTAAGAAGGTTTACATTATTAGCCTACGAACAAAGACAGGTTATGATAGGAAACAGAGCTCCTGTTTTTATTCAGCTTCCGGATAATAGGAATTG | Cassette primers for *URA3* integrated 16.3 kb right of CEN7 |
| URA3 AT HSP3_RP | GCAATCGATCGTAAACGCCACTCAAGCTAAACTGAAAACTACTACGCCTAGAAGGCTAATCGGTACCAATTAGAAGGACCACCTTTGATTG |
| URA3 AT CRTL7_FP | GATCACATATGATTCTAGTACCACTAAACATTATCAACAACTATCATCAATTAGTAGAATTACTCTGAGAGCTTCCGGATAATAGGAATTG | Cassette primers for *URA3* integrated 100 kb left of CEN7 |
| URA3 AT CRTL7_RP | CCACGTGGATTTTTAAAATCTCAATAGTTTCTATAGTGGTGGTATACCACTACTACGACTGTGGATTCATTAGAAGGACCACCTTTGATTG |
| URA3 at nCEN5-II_FP | CAATTCCTATTATCCGGAAGCTGTCGTGTAAGGCGGTAAATGGTTTTGGTGGGTTTATTTTTCTTTAAAAATCCAGACATGTCTTGC | Cassette primers for *URA3* integrated 7.5 kb left of CEN5 |
| URA3 at nCEN5-II_RP | CAATCAAAGGTGGTCCTTCTAACACACTATTTACTTGTGGTAAACATACTATTGGTTGATAATGATGTTAGCAATGGGTTTATGCTTATTTAC |
| nCEN7-3 | GCATACCTGACACTGTCGTT | q-PCR of *CEN7* |
| nCEN7-4 | AACGGTGCTACGTTTTTTTA |
| URA3 RT1 | TGTTGAAAGTTGCTGTAGTG | q-PCR for *URA3* promoter |
| URA3 RT2 | TGCAGGAAATAAGATTGC |
| URA3 RT3 | TCATCAGTGGGATCATTAGCA | q-PCR for *URA3* ORF |
| URA3 RT4 | CACGTTGGGCAATAAATCCA |
| 7S10 RTF | CTTGTAAATTTAATTGTCGCTGAGG | qPCR primers for neocentromere mapping |
| 7S10 RTR | CGGATAATCGTCCAACATATGAC |
| 7S11 RTF | GTCTTCTGACCTACCCATCAC |
| 7S11 RTR | GAGGCGGAAGTTGGACC |
| 7S12 RTF | CGTTGTGGCAATTGTATTTATG |
| 7S12 RTR | GCCATAGCTTAGCAAATAACC |
| 7S13 RTF | CATGGCTAATCCAACAACACATG |
| 7S13 RTR | GCTGGCTCTTGTTCTTGTATC |
| 421K RT1 | CCTATCGCCACAAGGGAGA |
| 421K RT2 | CAACGACTGCATTGACTCTTT |
| 7S14 RTF | GGATGTTGAGTTCAAAGCCTG |
| 7S14 RTR | CCAGCCAAATAATCTAGCTGC |
| R4TF | ATTTGTCCCATCCGTAATTGATTC |
| R3TR | ACGTTTTACCAGCCTATGC |
| 18RTF | AATAGCTATATCAGTTGTCAGCTTAC |
| 17RTF | AATGCTTGGCCCTCAGTATAAC |
| 20RTF | ACTGAAGTCGGCTGTGATC |
| 19RTR | GATAACTGGACTCATTAGGCGAA |
| 16RTF | ACCAGGATAATCTAACTGGCAAC |
| 1R5TR | CTATTGCCCCAATCAATAACCTT |
| 7FR1T | CAGTAAACGTCATCTCTTTTATACCT |
| 7RR1T | GGAAGTGTAACTATTGAGCTCC |
| 7FR2T | ATTAAATAGAATGCGGCAATACC |
| 7RR2T | ATTTTAAGGATGAGAGGTGTGG |
| 7FR3T | CTGGTATTCACAATGGAACGGT |
| 7RR3T | GTCACCCCAATTCAAATCACGT |
| 7FR4T | GGAGCTGGCGATCAATTTGT |
| 7RR4T | TCACACATGAGAGGACCGTT |
| 7F4A RTF | CGGATAATTGAAAGCAGCAATG |
| 7R4A RTR | CCACAACCTGTTGACGAG |
| 7F4B RT | GTAGGCGCGGATTTAATGTG |
| 7R4B RT | CCAACTTGTTTAGTTGTTGGATCTG |
| 7F4C RT | GACAAACACTCAAGGAGCAG |
| 7R4C RT | CTGCAAATCTATTGGAGGTGG |
| 7F5 RT | GGACAAAATCAGATACCAAGCC |
| 7R5 RT | GCTTTGGTCATACCAATACCAG |
| 7F6 RT | CTCCAAGAACATCAAATTGGG |
| 7R6 RT | CAAGGAAGTCATTTCTTCAGAAG |
| CEN7DHIS_FP | GTAAACTTTTTCGATTCTCAATTTACTTTGAGGGCATTGTCGCAAATGGAGATTCCTTACGATGGGAATTCCGGAATATTTATGAGAAAC | CEN7 DELETION WITH HIS1 |
| CEN7DHIS_RP | CACAAAAATGCCCGCTAACAATACCATTAATTCCTACTCCATGTACAGAATACCCAACATGCTTTGTATCGAATTCCGGGGATCCTGGAG |

**Literature cited:**

Joglekar, A. P., D. Bouck, K. Finley, X. Liu, Y. Wan *et al.*, 2008 Molecular architecture of the kinetochore-microtubule attachment site is conserved between point and regional centromeres. J Cell Biol 181**:** 587-594.

Thakur, J., and K. Sanyal, 2013 Efficient neocentromere formation is suppressed by gene conversion to maintain centromere function at native physical chromosomal loci in Candida albicans. Genome Res 23**:** 638-652.
